# Supplementary material for: Physicochemical Perturbation Increases Nitrous Oxide Production in Soils and Sediments
Source: Copernicus journal article supplement (doi:10.5194/egusphere-2024-448), 2024-03-25
Supplement: Supplementary file 1 [file egusphere-2024-448-supplement.pdf]

## Supplementary Material for

Weston et al. (2024)

### Physicochemical Perturbation Increases Nitrous Oxide Production in Soils and Sediments

---

The following tables provide N<sub>2</sub>O production, denitrification, and N<sub>2</sub>O:DNF ratio data derived from the pulse physicochemical perturbation experiments in two agricultural soils from Lancaster, PA (Table S1) and in estuarine sediments sampled along a salinity gradient in the Scheldt River estuary (Table S2). Data from the press disturbance experiment in which tidal freshwater marsh soils were subjected to control (S = 0) or press salinity (S = 20) treatments with rates of N<sub>2</sub>O production, denitrification, and N<sub>2</sub>O:DNF ratios measured over time at various pulsed salinities is also provided (Table S3), along with the gene and transcript abundance and gene expression on non-acetylene amended samples from the press experiment (Table S4).

**Table S1. Rates (average  $\pm$  SD; n = 3) of nitrous oxide (N<sub>2</sub>O) production and denitrification (N<sub>2</sub> + N<sub>2</sub>O production), and the ratio of N<sub>2</sub>O to total denitrification in soils collected from a conventional farm in Lancaster, PA subjected to changes in salinity, pH, zinc, temperature, and moisture away from *in situ* conditions.**

|                                                                  | N <sub>2</sub> O<br>( $\mu\text{mol g}^{-1} \text{d}^{-1}$ ) | Denitrification<br>( $\mu\text{mol g}^{-1} \text{d}^{-1}$ ) | N <sub>2</sub> O:DNF |
|------------------------------------------------------------------|--------------------------------------------------------------|-------------------------------------------------------------|----------------------|
| <b>Agricultural Soil - Conventional Farm</b>                     |                                                              |                                                             |                      |
| <b><math>\Delta</math> Salinity</b>                              |                                                              |                                                             |                      |
| 0                                                                | 0.791 $\pm$ 0.072                                            | 1.737 $\pm$ 0.118                                           | 0.456 $\pm$ 0.072    |
| 1                                                                | 0.884 $\pm$ 0.092                                            | 1.782 $\pm$ 0.265                                           | 0.496 $\pm$ 0.125    |
| 3                                                                | 1.096 $\pm$ 0.096                                            | 1.885 $\pm$ 0.149                                           | 0.581 $\pm$ 0.097    |
| 5                                                                | 1.235 $\pm$ 0.102                                            | 1.830 $\pm$ 0.114                                           | 0.675 $\pm$ 0.098    |
| 10                                                               | 1.101 $\pm$ 0.160                                            | 1.585 $\pm$ 0.054                                           | 0.695 $\pm$ 0.124    |
| 35                                                               | 0.632 $\pm$ 0.081                                            | 0.689 $\pm$ 0.035                                           | 0.918 $\pm$ 0.165    |
| <b><math>\Delta</math> pH</b>                                    |                                                              |                                                             |                      |
| -3                                                               | 1.033 $\pm$ 0.116                                            | 2.662 $\pm$ 0.115                                           | 0.388 $\pm$ 0.060    |
| -2                                                               | 1.023 $\pm$ 0.125                                            | 2.847 $\pm$ 0.199                                           | 0.359 $\pm$ 0.069    |
| -1                                                               | 0.661 $\pm$ 0.000                                            | 2.924 $\pm$ 0.092                                           | 0.226 $\pm$          |
| 0                                                                | 0.806 $\pm$ 0.121                                            | 2.958 $\pm$ 0.232                                           | 0.273 $\pm$ 0.062    |
| 1                                                                | 1.092 $\pm$ 0.077                                            | 2.485 $\pm$ 0.392                                           | 0.439 $\pm$ 0.100    |
| 2                                                                | 1.105 $\pm$ 0.083                                            | 2.653 $\pm$ 0.276                                           | 0.417 $\pm$ 0.075    |
| 3                                                                | 1.168 $\pm$ 0.151                                            | 2.511 $\pm$ 0.143                                           | 0.465 $\pm$ 0.087    |
| <b><math>\Delta</math> Zinc Concentration (g L<sup>-1</sup>)</b> |                                                              |                                                             |                      |
| 0                                                                | 0.192 $\pm$ 0.058                                            | 1.396 $\pm$ 0.174                                           | 0.137 $\pm$ 0.058    |
| 0.05                                                             | 0.124 $\pm$ 0.015                                            | 1.252 $\pm$ 0.159                                           | 0.099 $\pm$ 0.024    |
| 0.1                                                              | 0.122 $\pm$ 0.037                                            | 1.363 $\pm$ 0.085                                           | 0.089 $\pm$ 0.033    |
| 0.25                                                             | 0.443 $\pm$ 0.050                                            | 0.960 $\pm$ 0.132                                           | 0.462 $\pm$ 0.116    |
| 0.5                                                              | 0.415 $\pm$ 0.079                                            | 0.709 $\pm$ 0.085                                           | 0.585 $\pm$ 0.182    |
| 1                                                                | 0.333 $\pm$ 0.052                                            | 0.552 $\pm$ 0.066                                           | 0.603 $\pm$ 0.167    |
| <b><math>\Delta</math> Temperature (°C)</b>                      |                                                              |                                                             |                      |
| -17                                                              | 0.136 $\pm$ 0.023                                            | 0.899 $\pm$ 0.058                                           | 0.151 $\pm$ 0.036    |
| -7                                                               | 0.030 $\pm$ 0.009                                            | 1.659 $\pm$ 0.103                                           | 0.018 $\pm$ 0.007    |
| 0                                                                | 0.009 $\pm$ 0.001                                            | 1.333 $\pm$ 0.159                                           | 0.007 $\pm$ 0.001    |
| 6                                                                | 0.011 $\pm$ 0.006                                            | 1.052 $\pm$ 0.020                                           | 0.010 $\pm$ 0.006    |
| 15                                                               | 0.060 $\pm$ 0.060                                            | 0.985 $\pm$ 0.076                                           | 0.061 $\pm$ 0.066    |
| <b><math>\Delta</math> Moisture (%)</b>                          |                                                              |                                                             |                      |
| -50.0                                                            | 0.002 $\pm$ 0.000                                            | 0.002 $\pm$ 0.000                                           | 1.000 $\pm$ 0.287    |
| -45.2                                                            | 0.011 $\pm$ 0.001                                            | 0.013 $\pm$ 0.002                                           | 0.870 $\pm$ 0.165    |
| -40.9                                                            | 0.036 $\pm$ 0.006                                            | 0.040 $\pm$ 0.008                                           | 0.901 $\pm$ 0.335    |
| -33.3                                                            | 0.069 $\pm$ 0.026                                            | 0.102 $\pm$ 0.024                                           | 0.672 $\pm$ 0.412    |
| -16.7                                                            | 0.089 $\pm$ 0.013                                            | 0.209 $\pm$ 0.016                                           | 0.427 $\pm$ 0.093    |
| 0.0                                                              | 0.038 $\pm$ 0.006                                            | 0.207 $\pm$ 0.029                                           | 0.183 $\pm$ 0.055    |
| <b>Agricultural Soil - Organic Farm</b>                          |                                                              |                                                             |                      |
| <b><math>\Delta</math> Salinity</b>                              |                                                              |                                                             |                      |
| 0                                                                | 0.271 $\pm$ 0.039                                            | 1.075 $\pm$ 0.056                                           | 0.252 $\pm$ 0.049    |
| 1                                                                | 0.411 $\pm$ 0.036                                            | 1.091 $\pm$ 0.058                                           | 0.377 $\pm$ 0.053    |
| 3                                                                | 0.530 $\pm$ 0.063                                            | 0.958 $\pm$ 0.072                                           | 0.554 $\pm$ 0.107    |
| 5                                                                | 0.591 $\pm$ 0.053                                            | 0.870 $\pm$ 0.033                                           | 0.680 $\pm$ 0.086    |
| 10                                                               | 0.666 $\pm$ 0.007                                            | 0.985 $\pm$ 0.076                                           | 0.677 $\pm$ 0.060    |
| 35                                                               | 0.323 $\pm$ 0.027                                            | 0.340 $\pm$ 0.020                                           | 0.949 $\pm$ 0.135    |
| <b><math>\Delta</math> pH</b>                                    |                                                              |                                                             |                      |
| 0                                                                | 0.342 $\pm$ 0.050                                            | 1.410 $\pm$ 0.272                                           | 0.243 $\pm$ 0.082    |
| 1                                                                | 0.423 $\pm$ 0.015                                            | 1.717 $\pm$ 0.052                                           | 0.246 $\pm$ 0.016    |
| 2                                                                | 0.355 $\pm$ 0.088                                            | 1.780 $\pm$ 0.103                                           | 0.199 $\pm$ 0.061    |
| 3                                                                | 0.374 $\pm$ 0.073                                            | 1.586 $\pm$ 0.117                                           | 0.236 $\pm$ 0.064    |
| -1                                                               | 0.407 $\pm$ 0.045                                            | 1.459 $\pm$ 0.283                                           | 0.279 $\pm$ 0.085    |
| -2                                                               | 0.518 $\pm$ 0.100                                            | 1.529 $\pm$ 0.229                                           | 0.339 $\pm$ 0.116    |
| -3                                                               | 0.604 $\pm$ 0.072                                            | 1.459 $\pm$ 0.201                                           | 0.414 $\pm$ 0.107    |
| <b><math>\Delta</math> Zinc Concentration (g L<sup>-1</sup>)</b> |                                                              |                                                             |                      |
| 0                                                                | 1.419 $\pm$ 0.121                                            | 2.507 $\pm$ 0.116                                           | 0.566 $\pm$ 0.075    |
| 0.05                                                             | 1.298 $\pm$ 0.126                                            | 2.958 $\pm$ 0.232                                           | 0.439 $\pm$ 0.077    |
| 0.1                                                              | 1.162 $\pm$ 0.063                                            | 2.111 $\pm$ 0.189                                           | 0.550 $\pm$ 0.079    |
| 0.25                                                             | 1.097 $\pm$ 0.088                                            | 1.617 $\pm$ 0.112                                           | 0.678 $\pm$ 0.101    |
| 0.5                                                              | 1.031 $\pm$ 0.039                                            | 1.121 $\pm$ 0.101                                           | 0.920 $\pm$ 0.118    |
| 1                                                                | 0.806 $\pm$ 0.121                                            | 0.995 $\pm$ 0.067                                           | 0.811 $\pm$ 0.176    |
| <b><math>\Delta</math> Temperature (°C)</b>                      |                                                              |                                                             |                      |
| -17                                                              | 0.011 $\pm$                                                  | 0.307 $\pm$ 0.017                                           | 0.036 $\pm$ 0.002    |
| -7                                                               | 0.029 $\pm$ 0.020                                            | 0.876 $\pm$ 0.074                                           | 0.033 $\pm$ 0.026    |
| 0                                                                | 0.015 $\pm$ 0.000                                            | 0.761 $\pm$ 0.009                                           | 0.019 $\pm$ 0.001    |
| 6                                                                | 0.023 $\pm$ 0.011                                            | 0.654 $\pm$ 0.162                                           | 0.036 $\pm$ 0.025    |
| 15                                                               | 0.034 $\pm$ 0.017                                            | 0.501 $\pm$                                                 | 0.069 $\pm$ 0.034    |
| <b><math>\Delta</math> Moisture (%)</b>                          |                                                              |                                                             |                      |
| -50.0                                                            | 0.001 $\pm$ 0.000                                            | 0.002 $\pm$ 0.000                                           | 0.840 $\pm$ 0.265    |
| -45.2                                                            | 0.015 $\pm$ 0.004                                            | 0.016 $\pm$ 0.006                                           | 0.919 $\pm$ 0.590    |
| -40.9                                                            | 0.045 $\pm$ 0.012                                            | 0.057 $\pm$ 0.005                                           | 0.781 $\pm$ 0.280    |
| -33.3                                                            | 0.089 $\pm$ 0.002                                            | 0.091 $\pm$ 0.011                                           | 0.973 $\pm$ 0.138    |
| -16.7                                                            | 0.042 $\pm$ 0.010                                            | 0.263 $\pm$ 0.029                                           | 0.161 $\pm$ 0.057    |
| 0.0                                                              | 0.015 $\pm$ 0.003                                            | 0.174 $\pm$ 0.018                                           | 0.087 $\pm$ 0.025    |

**Table S2. Rates (average  $\pm$  SD; n = 3) of nitrous oxide (N<sub>2</sub>O) production and denitrification (N<sub>2</sub> + N<sub>2</sub>O production), and the ratio of N<sub>2</sub>O to total denitrification in sediments collected along the salinity gradient in the Schelde Estuary subjected to changes in salinity.**

|                         | $\Delta$ Salinity | N <sub>2</sub> O<br>( $\mu\text{mol g}^{-1} \text{d}^{-1}$ ) | Denitrification<br>( $\mu\text{mol g}^{-1} \text{d}^{-1}$ ) | N <sub>2</sub> O:DNF |
|-------------------------|-------------------|--------------------------------------------------------------|-------------------------------------------------------------|----------------------|
| <b>Tidal freshwater</b> | 0                 | 0.003 $\pm$ 0.000                                            | 0.393 $\pm$ 0.073                                           | 0.008 $\pm$ 0.003    |
|                         | 1                 | 0.004 $\pm$ 0.000                                            | 0.313 $\pm$ 0.064                                           | 0.013 $\pm$ 0.004    |
|                         | 3                 | 0.004 $\pm$ 0.000                                            | 0.291 $\pm$ 0.025                                           | 0.013 $\pm$ 0.001    |
|                         | 5                 | 0.004 $\pm$ 0.000                                            | 0.295 $\pm$ 0.007                                           | 0.014 $\pm$ 0.002    |
|                         | 10                | 0.011 $\pm$ 0.003                                            | 0.206 $\pm$ 0.025                                           | 0.056 $\pm$ 0.019    |
|                         | 15                | 0.029 $\pm$ 0.001                                            | 0.151 $\pm$ 0.057                                           | 0.193 $\pm$ 0.079    |
|                         | 30                | 0.050 $\pm$ 0.006                                            | 0.094 $\pm$ 0.023                                           | 0.536 $\pm$ 0.190    |
| <b>Oligohaline</b>      | -5                | 0.003 $\pm$ 0.001                                            | 0.052 $\pm$ 0.002                                           | 0.059 $\pm$ 0.027    |
|                         | -4                | 0.003 $\pm$ 0.000                                            | 0.063 $\pm$ 0.007                                           | 0.053 $\pm$ 0.014    |
|                         | -2                | 0.004 $\pm$ 0.001                                            | 0.087 $\pm$ 0.013                                           | 0.042 $\pm$ 0.016    |
|                         | 0                 | 0.002 $\pm$ 0.000                                            | 0.110 $\pm$ 0.003                                           | 0.015 $\pm$ 0.005    |
|                         | 5                 | 0.008 $\pm$ 0.004                                            | 0.105 $\pm$ 0.013                                           | 0.075 $\pm$ 0.050    |
|                         | 10                | 0.006 $\pm$ 0.001                                            | 0.106 $\pm$ 0.007                                           | 0.060 $\pm$ 0.014    |
|                         | 25                | 0.014 $\pm$ 0.011                                            | 0.094 $\pm$ 0.003                                           | 0.147 $\pm$ 0.119    |
| <b>Mesohaline</b>       | -24               | 0.038 $\pm$ 0.006                                            | 0.188 $\pm$ 0.029                                           | 0.203 $\pm$ 0.063    |
|                         | -21               | 0.035 $\pm$ 0.001                                            | 0.252 $\pm$ 0.048                                           | 0.138 $\pm$ 0.032    |
|                         | -19               | 0.028 $\pm$ 0.004                                            | 0.288 $\pm$ 0.033                                           | 0.096 $\pm$ 0.023    |
|                         | -14               | 0.014 $\pm$ 0.007                                            | 0.433 $\pm$ 0.033                                           | 0.033 $\pm$ 0.019    |
|                         | 0                 | 0.003 $\pm$ 0.000                                            | 0.641 $\pm$ 0.038                                           | 0.005 $\pm$ 0.000    |
|                         | 6                 | 0.035 $\pm$ 0.003                                            | 0.571 $\pm$ 0.042                                           | 0.062 $\pm$ 0.010    |

**Table S3. Rates of nitrous oxide (N<sub>2</sub>O) production and denitrification (N<sub>2</sub> + N<sub>2</sub>O production), and the ratio of N<sub>2</sub>O to total denitrification in tidal freshwater soils in a 6-month experiment under control (S = 0) or press treatment (S = 20) conditions subjected to short-term pulsed changes in salinity.**

| Time (day) | Press Salinity Treatment | Pulse Salinity Treatment | N <sub>2</sub> O (μmol g <sup>-1</sup> d <sup>-1</sup> ) | Denitrification (μmol g <sup>-1</sup> d <sup>-1</sup> ) | N <sub>2</sub> O:DNF |
|------------|--------------------------|--------------------------|----------------------------------------------------------|---------------------------------------------------------|----------------------|
| 0          | Control (S = 0)          | 0.0                      | 0.054 ± 0.027                                            | 1.363 ± 0.339                                           | 0.038 ± 0.010        |
| 0          | Control (S = 0)          | 4.3                      | 0.383 ± 0.307                                            | 1.668 ± 0.329                                           | 0.215 ± 0.142        |
| 0          | Control (S = 0)          | 7.6                      | 0.838 ± 0.549                                            | 1.537 ± 0.312                                           | 0.520 ± 0.252        |
| 0          | Control (S = 0)          | 16.9                     | 0.664 ± 0.213                                            | 0.877 ± 0.076                                           | 0.749 ± 0.177        |
| 0          | Control (S = 0)          | 25.6                     | 0.332 ± 0.126                                            | 0.374 ± 0.061                                           | 0.872 ± 0.193        |
| 0          | Press (S = 20)           | 3.5                      | 0.286 ± 0.048                                            | 1.724 ± 0.021                                           | 0.166 ± 0.030        |
| 0          | Press (S = 20)           | 7.4                      | 0.527 ± 0.022                                            | 1.129 ± 0.301                                           | 0.481 ± 0.109        |
| 0          | Press (S = 20)           | 11.6                     | 0.511 ± 0.182                                            | 0.895 ± 0.214                                           | 0.562 ± 0.069        |
| 0          | Press (S = 20)           | 20.0                     | 0.313 ± 0.097                                            | 0.478 ± 0.072                                           | 0.648 ± 0.105        |
| 0          | Press (S = 20)           | 28.3                     | 0.173 ± 0.029                                            | 0.230 ± 0.049                                           | 0.756 ± 0.037        |
| 7          | Control (S = 0)          | 0.0                      | 0.110 ± 0.010                                            | 1.607 ± 0.615                                           | 0.072 ± 0.021        |
| 7          | Control (S = 0)          | 4.3                      | 0.243 ± 0.067                                            | 2.079 ± 0.629                                           | 0.118 ± 0.003        |
| 7          | Control (S = 0)          | 7.6                      | 0.525 ± 0.172                                            | 1.552 ± 0.449                                           | 0.337 ± 0.014        |
| 7          | Control (S = 0)          | 16.9                     | 0.422 ± 0.172                                            | 0.848 ± 0.595                                           | 0.565 ± 0.193        |
| 7          | Control (S = 0)          | 25.6                     | 0.244 ± 0.030                                            | 0.436 ± 0.231                                           | 0.628 ± 0.262        |
| 7          | Press (S = 20)           | 3.5                      | 0.240 ± 0.051                                            | 1.158 ± 0.424                                           | 0.230 ± 0.128        |
| 7          | Press (S = 20)           | 7.4                      | 0.339 ± 0.015                                            | 1.363 ± 0.306                                           | 0.257 ± 0.069        |
| 7          | Press (S = 20)           | 11.6                     | 0.276 ± 0.027                                            | 1.079 ± 0.071                                           | 0.257 ± 0.042        |
| 7          | Press (S = 20)           | 20.0                     | 0.180 ± 0.125                                            | 0.778 ± 0.274                                           | 0.216 ± 0.085        |
| 7          | Press (S = 20)           | 28.3                     | 0.133 ± 0.098                                            | 0.617 ± 0.057                                           | 0.209 ± 0.139        |
| 14         | Control (S = 0)          | 0.0                      | 0.160 ± 0.003                                            | 1.261 ± 0.069                                           | 0.127 ± 0.009        |
| 14         | Control (S = 0)          | 4.3                      | 0.145 ± 0.047                                            | 1.807 ± 0.415                                           | 0.085 ± 0.046        |
| 14         | Control (S = 0)          | 7.6                      | 0.353 ± 0.062                                            | 1.498 ± 0.039                                           | 0.235 ± 0.035        |
| 14         | Control (S = 0)          | 16.9                     | 0.618 ± 0.064                                            | 1.084 ± 0.031                                           | 0.571 ± 0.075        |
| 14         | Control (S = 0)          | 25.6                     | 0.343 ± 0.049                                            | 0.439 ± 0.139                                           | 0.839 ± 0.376        |
| 14         | Press (S = 20)           | 3.5                      | 0.130 ± 0.084                                            | 1.811 ± 0.381                                           | 0.079 ± 0.063        |
| 14         | Press (S = 20)           | 7.4                      | 0.050 ± 0.001                                            | 1.555 ± 0.406                                           | 0.033 ± 0.009        |
| 14         | Press (S = 20)           | 11.6                     | 0.083 ± 0.034                                            | 1.543 ± 0.359                                           | 0.053 ± 0.010        |
| 14         | Press (S = 20)           | 20.0                     | 0.043 ± 0.018                                            | 1.565 ± 1.104                                           | 0.031 ± 0.010        |
| 14         | Press (S = 20)           | 28.3                     | 0.030 ± 0.001                                            | 2.391 ± 1.086                                           | 0.014 ± 0.007        |
| 21         | Control (S = 0)          | 0.0                      | 0.099 ± 0.013                                            | 1.777 ± 0.508                                           | 0.059 ± 0.024        |
| 21         | Control (S = 0)          | 4.3                      | 0.289 ± 0.163                                            | 1.599 ± 0.182                                           | 0.188 ± 0.123        |
| 21         | Control (S = 0)          | 7.6                      | 0.298 ± 0.111                                            | 1.266 ± 0.335                                           | 0.232 ± 0.026        |
| 21         | Control (S = 0)          | 16.9                     | 0.443 ± 0.034                                            | 0.961 ± 0.465                                           | 0.532 ± 0.293        |
| 21         | Control (S = 0)          | 25.6                     | 0.368 ± 0.107                                            | 0.411 ± 0.005                                           | 0.897 ± 0.274        |
| 21         | Press (S = 20)           | 3.5                      | 0.129 ± 0.081                                            | 1.153 ± 1.020                                           | 0.133 ± 0.047        |
| 21         | Press (S = 20)           | 7.4                      | 0.021 ± 0.011                                            | 1.398 ± 1.318                                           | 0.020 ± 0.011        |
| 21         | Press (S = 20)           | 11.6                     | 0.055 ± 0.005                                            | 0.751 ± 0.332                                           | 0.080 ± 0.028        |
| 21         | Press (S = 20)           | 20.0                     | 0.032 ± 0.002                                            | 1.161 ± 1.199                                           | 0.057 ± 0.057        |
| 21         | Press (S = 20)           | 28.3                     | 0.091 ± 0.098                                            | 0.711 ± 0.403                                           | 0.199 ± 0.250        |
| 35         | Control (S = 0)          | 0.0                      | 0.012 ± 0.012                                            | 0.418 ± 0.043                                           | 0.030 ± 0.032        |
| 35         | Control (S = 0)          | 4.3                      | 0.013 ± 0.013                                            | 0.641 ± 0.049                                           | 0.022 ± 0.022        |
| 35         | Control (S = 0)          | 7.6                      | 0.047 ± 0.056                                            | 0.646 ± 0.079                                           | 0.079 ± 0.097        |
| 35         | Control (S = 0)          | 16.9                     | 0.207 ± 0.046                                            | 0.350 ± 0.105                                           | 0.640 ± 0.324        |
| 35         | Control (S = 0)          | 25.6                     | 0.146 ± 0.027                                            | 0.162 ± 0.053                                           | 0.921 ± 0.129        |

Table S3. Continued.

| Time (day) | Press Salinity Treatment | Pulse Salinity Treatment | N <sub>2</sub> O ( $\mu\text{mol g}^{-1} \text{d}^{-1}$ ) | Denitrification ( $\mu\text{mol g}^{-1} \text{d}^{-1}$ ) | N <sub>2</sub> O:DNF |
|------------|--------------------------|--------------------------|-----------------------------------------------------------|----------------------------------------------------------|----------------------|
| 35         | Press (S = 20)           | 3.5                      | 0.140 ± 0.062                                             | 0.469 ± 0.249                                            | 0.305 ± 0.029        |
| 35         | Press (S = 20)           | 7.4                      | 0.109 ± 0.102                                             | 0.579 ± 0.108                                            | 0.175 ± 0.143        |
| 35         | Press (S = 20)           | 11.6                     | 0.103 ± 0.120                                             | 0.486 ± 0.409                                            | 0.168 ± 0.105        |
| 35         | Press (S = 20)           | 20.0                     | 0.092 ± 0.111                                             | 0.759 ± 0.717                                            | 0.095 ± 0.056        |
| 35         | Press (S = 20)           | 28.3                     | 0.061 ± 0.069                                             | 0.721 ± 0.312                                            | 0.070 ± 0.066        |
| 49         | Control (S = 0)          | 0.0                      | 0.008 ± 0.006                                             | 0.258 ± 0.190                                            | 0.057 ± 0.067        |
| 49         | Control (S = 0)          | 4.3                      | 0.006 ± 0.000                                             | 0.129 ± 0.012                                            | 0.044 ± 0.002        |
| 49         | Control (S = 0)          | 7.6                      | 0.018 ± 0.020                                             | 0.130 ±                                                  | 0.241 ±              |
| 49         | Control (S = 0)          | 16.9                     | 0.038 ± 0.034                                             | 0.167 ± 0.040                                            | 0.207 ± 0.152        |
| 49         | Control (S = 0)          | 25.6                     | 0.045 ± 0.046                                             | 0.125 ± 0.028                                            | 0.323 ± 0.293        |
| 49         | Press (S = 20)           | 3.5                      | 0.016 ± 0.011                                             | 0.089 ± 0.047                                            | 0.242 ± 0.247        |
| 49         | Press (S = 20)           | 7.4                      | 0.013 ± 0.000                                             | 0.083 ± 0.059                                            | 0.219 ± 0.158        |
| 49         | Press (S = 20)           | 11.6                     | 0.009 ± 0.000                                             | 0.123 ± 0.075                                            | 0.092 ± 0.053        |
| 49         | Press (S = 20)           | 20.0                     | 0.010 ± 0.003                                             | 0.130 ± 0.056                                            | 0.087 ± 0.057        |
| 49         | Press (S = 20)           | 28.3                     | 0.012 ± 0.008                                             | 0.085 ± 0.046                                            | 0.193 ± 0.195        |
| 70         | Control (S = 0)          | 0.0                      | 0.020 ± 0.002                                             | 0.947 ± 0.003                                            | 0.021 ± 0.002        |
| 70         | Control (S = 0)          | 4.3                      | 0.029 ± 0.005                                             | 0.710 ± 0.352                                            | 0.049 ± 0.031        |
| 70         | Control (S = 0)          | 7.6                      | 0.148 ± 0.022                                             | 0.704 ± 0.034                                            | 0.211 ± 0.042        |
| 70         | Control (S = 0)          | 16.9                     | 0.181 ± 0.016                                             | 0.442 ± 0.074                                            | 0.419 ± 0.107        |
| 70         | Control (S = 0)          | 25.6                     | 0.175 ± 0.012                                             | 0.196 ± 0.019                                            | 0.898 ± 0.023        |
| 70         | Press (S = 20)           | 3.5                      | 0.052 ± 0.033                                             | 0.178 ± 0.011                                            | 0.299 ± 0.204        |
| 70         | Press (S = 20)           | 7.4                      | 0.045 ± 0.034                                             | 0.232 ± 0.004                                            | 0.193 ± 0.149        |
| 70         | Press (S = 20)           | 11.6                     | 0.040 ± 0.030                                             | 0.314 ± 0.100                                            | 0.117 ± 0.057        |
| 70         | Press (S = 20)           | 20.0                     | 0.031 ± 0.016                                             | 0.349 ± 0.009                                            | 0.088 ± 0.043        |
| 70         | Press (S = 20)           | 28.3                     | 0.027 ± 0.013                                             | 0.241 ± 0.009                                            | 0.112 ± 0.049        |
| 110        | Control (S = 0)          | 0.0                      | 0.029 ± 0.038                                             | 0.614 ± 0.084                                            | 0.052 ± 0.069        |
| 110        | Control (S = 0)          | 4.3                      | 0.070 ± 0.071                                             | 0.518 ± 0.156                                            | 0.162 ± 0.185        |
| 110        | Control (S = 0)          | 7.6                      | 0.169 ± 0.028                                             | 0.523 ± 0.103                                            | 0.335 ± 0.119        |
| 110        | Control (S = 0)          | 16.9                     | 0.189 ± 0.017                                             | 0.346 ± 0.033                                            | 0.551 ± 0.102        |
| 110        | Control (S = 0)          | 25.6                     | 0.152 ± 0.058                                             | 0.168 ± 0.016                                            | 0.894 ± 0.260        |
| 110        | Press (S = 20)           | 3.5                      | 0.075 ± 0.046                                             | 0.221 ± 0.033                                            | 0.329 ± 0.158        |
| 110        | Press (S = 20)           | 7.4                      | 0.055 ± 0.015                                             | 0.238 ± 0.061                                            | 0.230 ± 0.002        |
| 110        | Press (S = 20)           | 11.6                     | 0.034 ± 0.032                                             | 0.261 ± 0.091                                            | 0.116 ± 0.082        |
| 110        | Press (S = 20)           | 20.0                     | 0.012 ± 0.001                                             | 0.337 ± 0.091                                            | 0.036 ± 0.007        |
| 110        | Press (S = 20)           | 28.3                     | 0.035 ± 0.019                                             | 0.128 ± 0.023                                            | 0.266 ± 0.098        |
| 181        | Control (S = 0)          | 0.0                      | 0.114 ± 0.065                                             | 2.293 ± 0.062                                            | 0.050 ± 0.030        |
| 181        | Control (S = 0)          | 4.3                      | 0.097 ± 0.034                                             | 1.862 ± 0.155                                            | 0.053 ± 0.023        |
| 181        | Control (S = 0)          | 7.6                      | 0.281 ± 0.118                                             | 1.434 ± 0.284                                            | 0.208 ± 0.123        |
| 181        | Control (S = 0)          | 16.9                     | 0.420 ± 0.051                                             | 0.732 ± 0.124                                            | 0.575 ± 0.027        |
| 181        | Control (S = 0)          | 25.6                     | 0.404 ± 0.112                                             | 0.438 ± 0.110                                            | 0.986 ± 0.503        |
| 181        | Press (S = 20)           | 3.5                      | 0.082 ± 0.069                                             | 0.405 ± 0.278                                            | 0.190 ± 0.039        |
| 181        | Press (S = 20)           | 7.4                      | 0.067 ± 0.076                                             | 0.505 ± 0.298                                            | 0.106 ± 0.088        |
| 181        | Press (S = 20)           | 11.6                     | 0.066 ± 0.081                                             | 0.491 ± 0.414                                            | 0.102 ± 0.079        |
| 181        | Press (S = 20)           | 20.0                     | 0.057 ± 0.069                                             | 0.872 ± 0.868                                            | 0.052 ± 0.028        |
| 181        | Press (S = 20)           | 28.3                     | 0.021 ± 0.014                                             | 0.301 ± 0.189                                            | 0.069 ± 0.004        |

**Table S4. Average ( $\pm$  SD; n = 4) nitrate reductase (nirS) and nitrous oxide reductase (nosZ) gene abundance (DNA), gene transcripts (cDNA), and gene expression (cDNA/DNA) in soils from select samples taken from the press/pulse experiment.**

| Time (day) | Press Salinity Treatment | Pulse Salinity Treatment | DNA ( $10^9$ copies $g^{-1}$ ) |                 | cDNA ( $10^9$ copies $g^{-1}$ ) |                 | Expression |        |
|------------|--------------------------|--------------------------|--------------------------------|-----------------|---------------------------------|-----------------|------------|--------|
|            |                          |                          | nirS                           | nosZ            | nirS                            | nosZ            | nirS       | nosZ   |
| 7          | Control (S = 0)          | 0.0                      | 7.63 $\pm$ 2.55                | 0.08 $\pm$ 0.04 | 0.70 $\pm$ 0.78                 | 0.08 $\pm$ 0.02 | 0.092      | 0.937  |
| 7          | Control (S = 0)          | 25.6                     | 4.74 $\pm$ 1.18                | 0.05 $\pm$ 0.04 | 0.45 $\pm$ 0.54                 | 0.00 $\pm$ 0.00 | 0.094      | 0.000  |
| 7          | Press (S = 20)           | 2.6                      | 4.21 $\pm$ 3.08                | 0.07 $\pm$ 0.03 | 0.00 $\pm$ 0.00                 | 0.00 $\pm$ 0.00 | 0.000      | 0.000  |
| 7          | Press (S = 20)           | 28.0                     | 1.39 $\pm$ 0.04                | 0.01 $\pm$ 0.00 | 9.98 $\pm$ 12.96                | 0.12 $\pm$ 0.00 | 7.181      | 10.092 |
| 35         | Control (S = 0)          | 0.0                      | 3.05 $\pm$ 1.33                | 0.04 $\pm$ 0.00 | 0.10 $\pm$ 0.11                 | 1.55 $\pm$ 0.35 | 0.032      | 43.147 |
| 35         | Control (S = 0)          | 24.8                     | 2.09 $\pm$ 0.41                | 0.02 $\pm$ 0.00 | 1.03 $\pm$ 0.21                 | 0.00 $\pm$ 0.00 | 0.490      | 0.000  |
| 35         | Press (S = 20)           | 1.1                      | 1.53 $\pm$ 0.81                | 0.03 $\pm$ 0.03 | 0.00 $\pm$ 0.00                 | 0.09 $\pm$ 0.01 | 0.000      | 3.072  |
| 35         | Press (S = 20)           | 19.5                     | 7.32 $\pm$ 1.37                | 0.05 $\pm$ 0.00 | 5.49 $\pm$ 5.83                 | 1.04 $\pm$ 0.51 | 0.750      | 21.612 |
| 110        | Control (S = 0)          | 0.0                      | 1.29 $\pm$ 0.08                | 0.01 $\pm$ 0.00 | 1.59 $\pm$ 1.32                 | 0.16 $\pm$ 0.08 | 1.236      | 15.416 |
| 110        | Control (S = 0)          | 24.8                     | 3.45 $\pm$ 2.81                | 0.04 $\pm$ 0.03 | 0.02 $\pm$ 0.02                 | 0.00 $\pm$ 0.00 | 0.006      | 0.000  |
| 110        | Press (S = 20)           | 1.1                      | 5.23 $\pm$ 2.44                | 0.05 $\pm$ 0.01 | 0.06 $\pm$ 0.08                 | 0.01 $\pm$ 0.00 | 0.012      | 0.169  |
| 110        | Press (S = 20)           | 19.5                     | 3.41 $\pm$ 3.12                | 0.03 $\pm$ 0.03 | 0.85 $\pm$ 0.54                 | 0.50 $\pm$ 0.44 | 0.250      | 18.643 |
